# Supplementary material for: Novel Phytosomal Formulation of Emblica officinalis Extracts with Its In Vivo Nootropic Potential in Rats: Optimization and Development by Box-Behnken Design
Source: Hindawi journal article supplement (doi:10.1155/2024/6644815), 2024-04-04
Supplement: f1 [file 6644815.f1.docx]

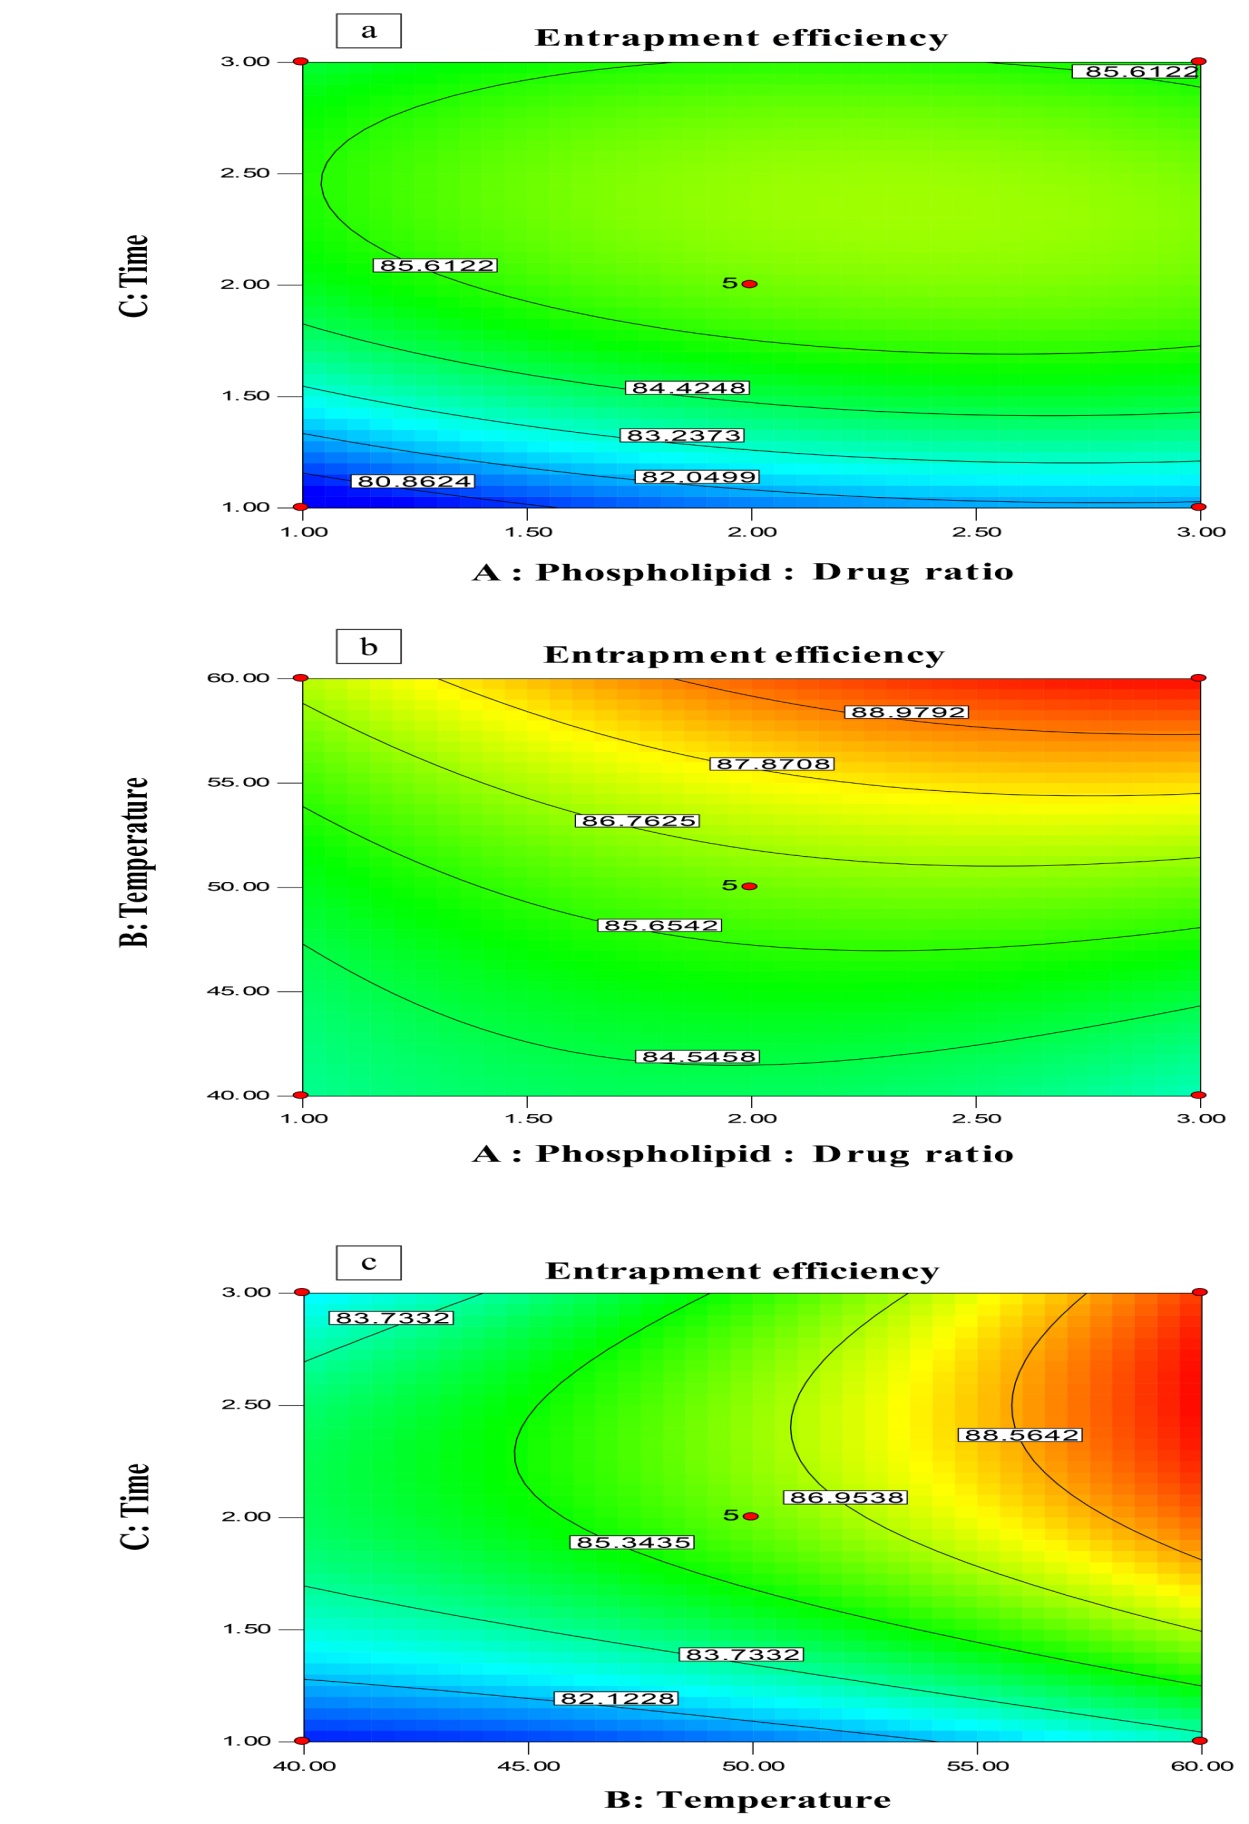


**Supplementary Figure 1.** 2D contour plot showing the interactive effect of (a) phospholipid concentration and time, (b) phospholipid concentration and temperature, and (c) temperature and time on E.E

**Supplementary Table 1.** Quadratic model R – square values of responses and polynomial equation

| Quadratic Model | R2 | Adjusted R2 | Predicted R2 | Adequate precision | SD | %CV |
| --- | --- | --- | --- | --- | --- | --- |
| Response R | 0.9747 | 0.9423 | 0.7525 | 19.487 | 0.70 | 0.82 |
| **Response surface model (RSM) Quadratic polynomial Final Equation:**  R = 86.30 + 0.66 A + 2.48 B + 2.11 C + 0.85 AB – 0.43 AC + 1.05 BC – 0.69 A2 + 0.49 B2 – 2.74 C2 | | | | | | |

**Supplementary Table 2.** *In vitro* drug release studies of EOE, PM and EOP

| **Time in hours** | **Cumulative release of *Emblica officinalis* Extract (EOE) in %** | **Cumulative release ofEOE: Leciva S75 Physical Mixture in %** | **Cumulative release of *Emblica officinalis* Phytosomes (EOP) in %** |
| --- | --- | --- | --- |
| 0.16 | 0.18 ± 0.13 | 0.22 ± 0.06 | 0.44 ± 0.2 |
| 0.33 | 1.17± 0.1 | 2.18 ± 0.14 | 3.31 ± 0.1 |
| 0.5 | 2.34 ± 0.35 | 3.74 ± 0.12 | 6.49 ± 0.12 |
| 1 | 2.88 ± 0.325 | 4.95 ± 0.18 | 9.7 ± 0.165 |
| 2 | 3.41 ± 0.205 | 7.78 ± 0.13 | 12.44 ± 0.195 |
| 3 | 3.44 ± 0.23 | 9.16 ± 0.18 | 15.33 ± 0.0850 |
| 4 | 5.99 ± 0.295 | 11.42 ± 0.195 | 18.18 ± 0.115 |
| 5 | 7.15 ± 0.26 | 14.69 ± 0.155 | 26.92 ± 0.135 |
| 6 | 8.05 ± 0.195 | 19.02 ± 0.081 | 34.16 ± 0.115 |
| 7 | 8.61 ± 0.165 | 21.73 ± 0.08 | 39.98 ± 0.205 |
| 8 | 9.49 ± 0.12 | 25.56 ± 0.075 | 44.11 ± 0.38 |
| 9 | 11.74 ± 0.185 | 27.85 ± 0.135 | 51.37 ± 0.255 |
| 10 | 13.95 ± 0.28 | 29.87 ± 0.21 | 58.18 ± 0.065 |
| 11 | 16.03 ± 0.225 | 31.45 ± 0.18 | 63.8 ± 0.195 |
| 12 | 21.33 ± 0.141 | 33.35 ± 0.165 | 69.82 ± 0.17 |

*The information is shown as Mean ± SD values (n = 3)


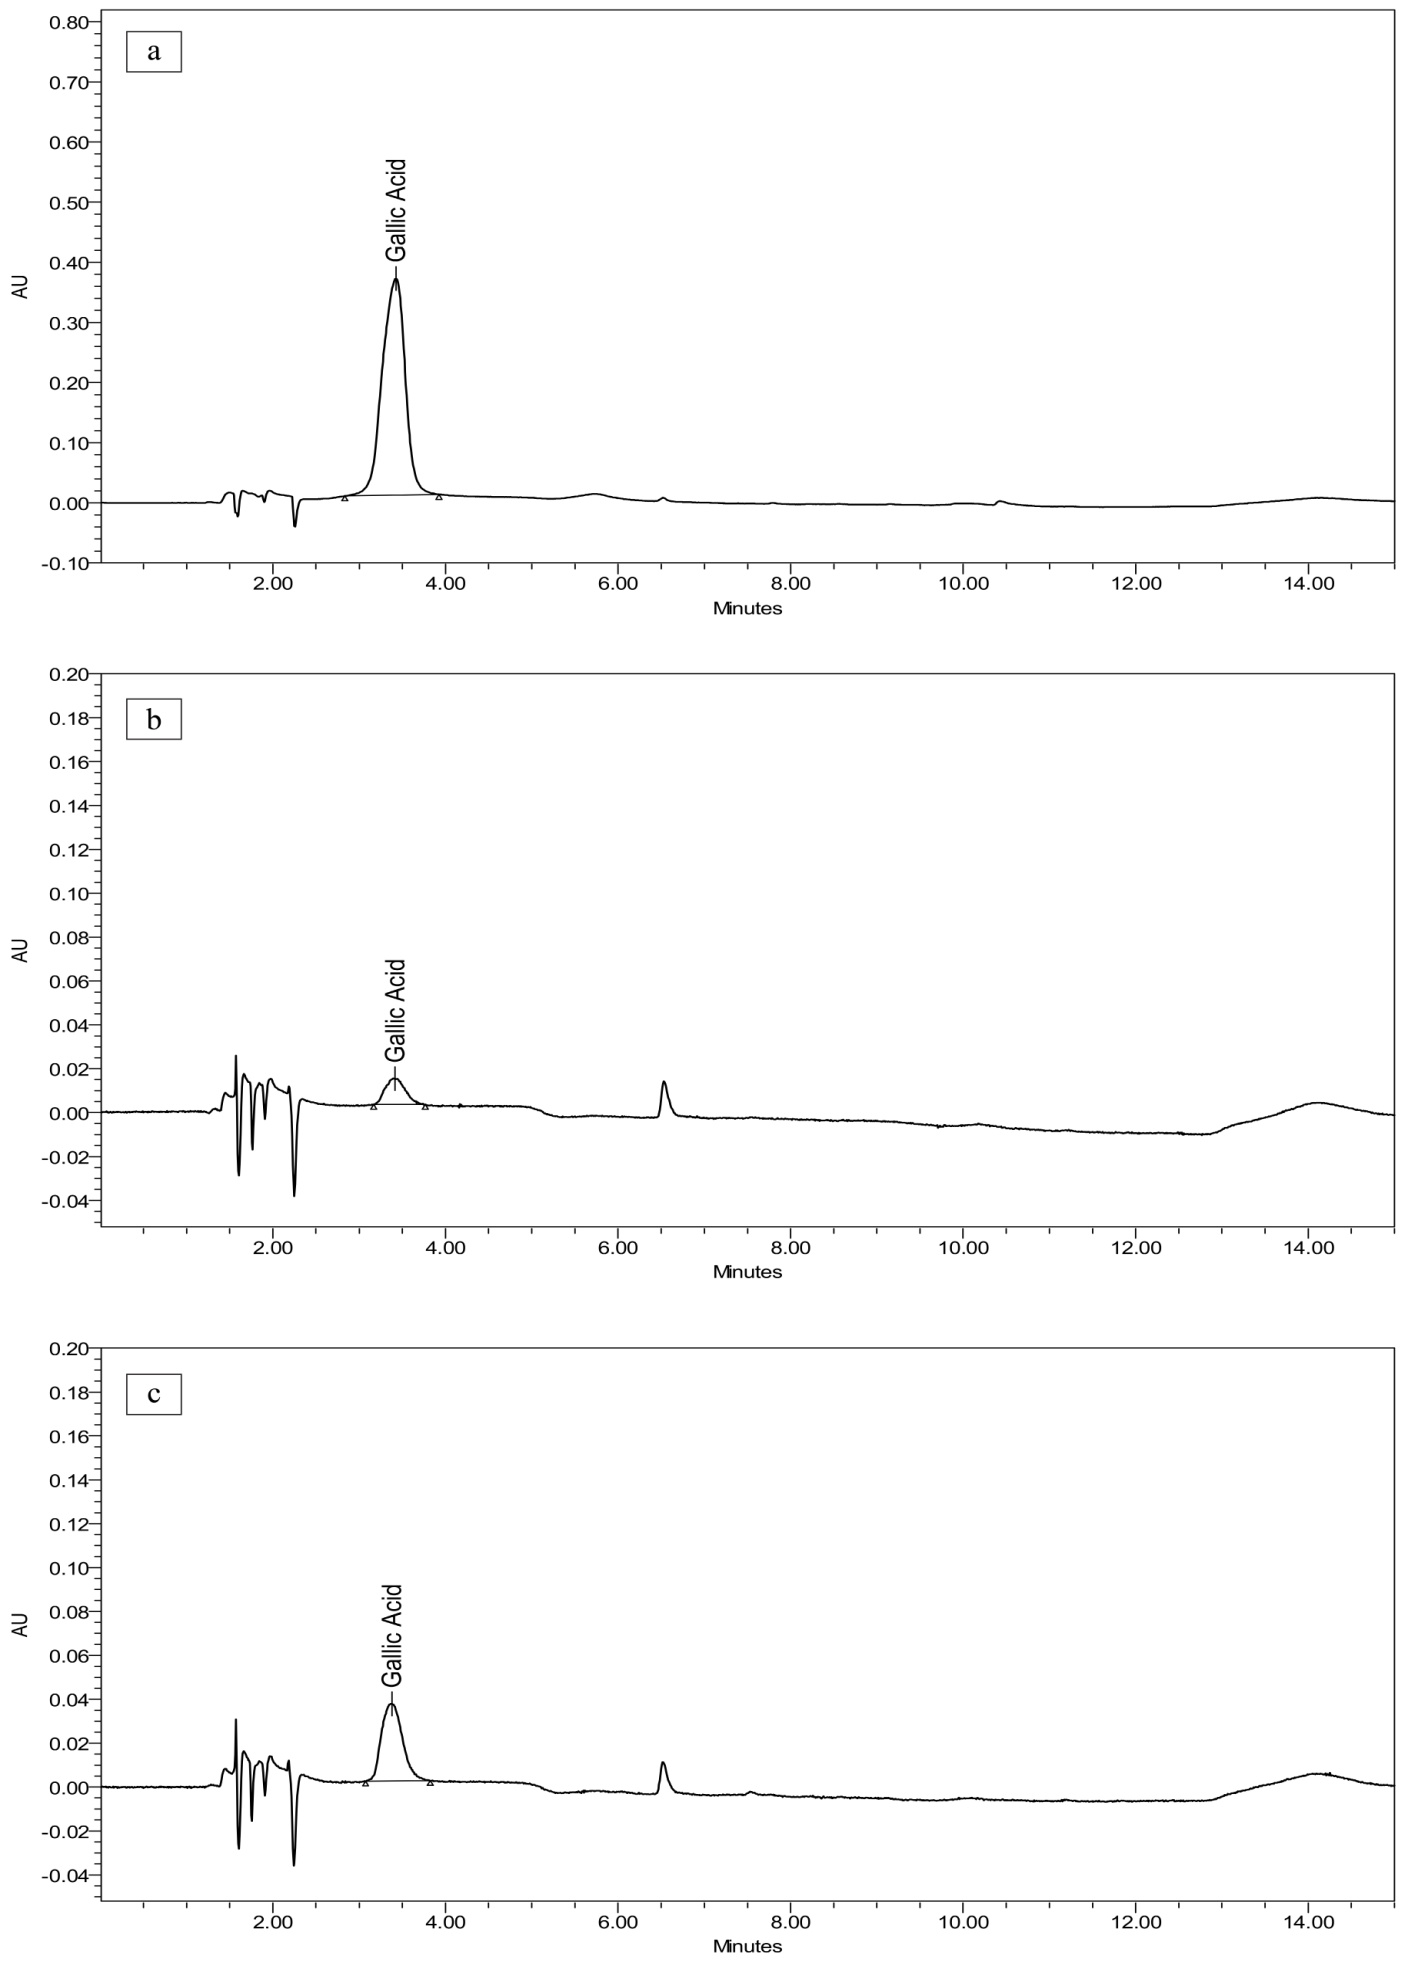


**Supplementary Figure 2.** Typical HPLC Chromatogram of (a) Standard Gallic acid and (b) EOE (c) EOP in Wistar rat plasma (Rt = 3.42 minutes)
